# Supplementary material
Source: PubMed Central journal article supplement (PMC3288200)

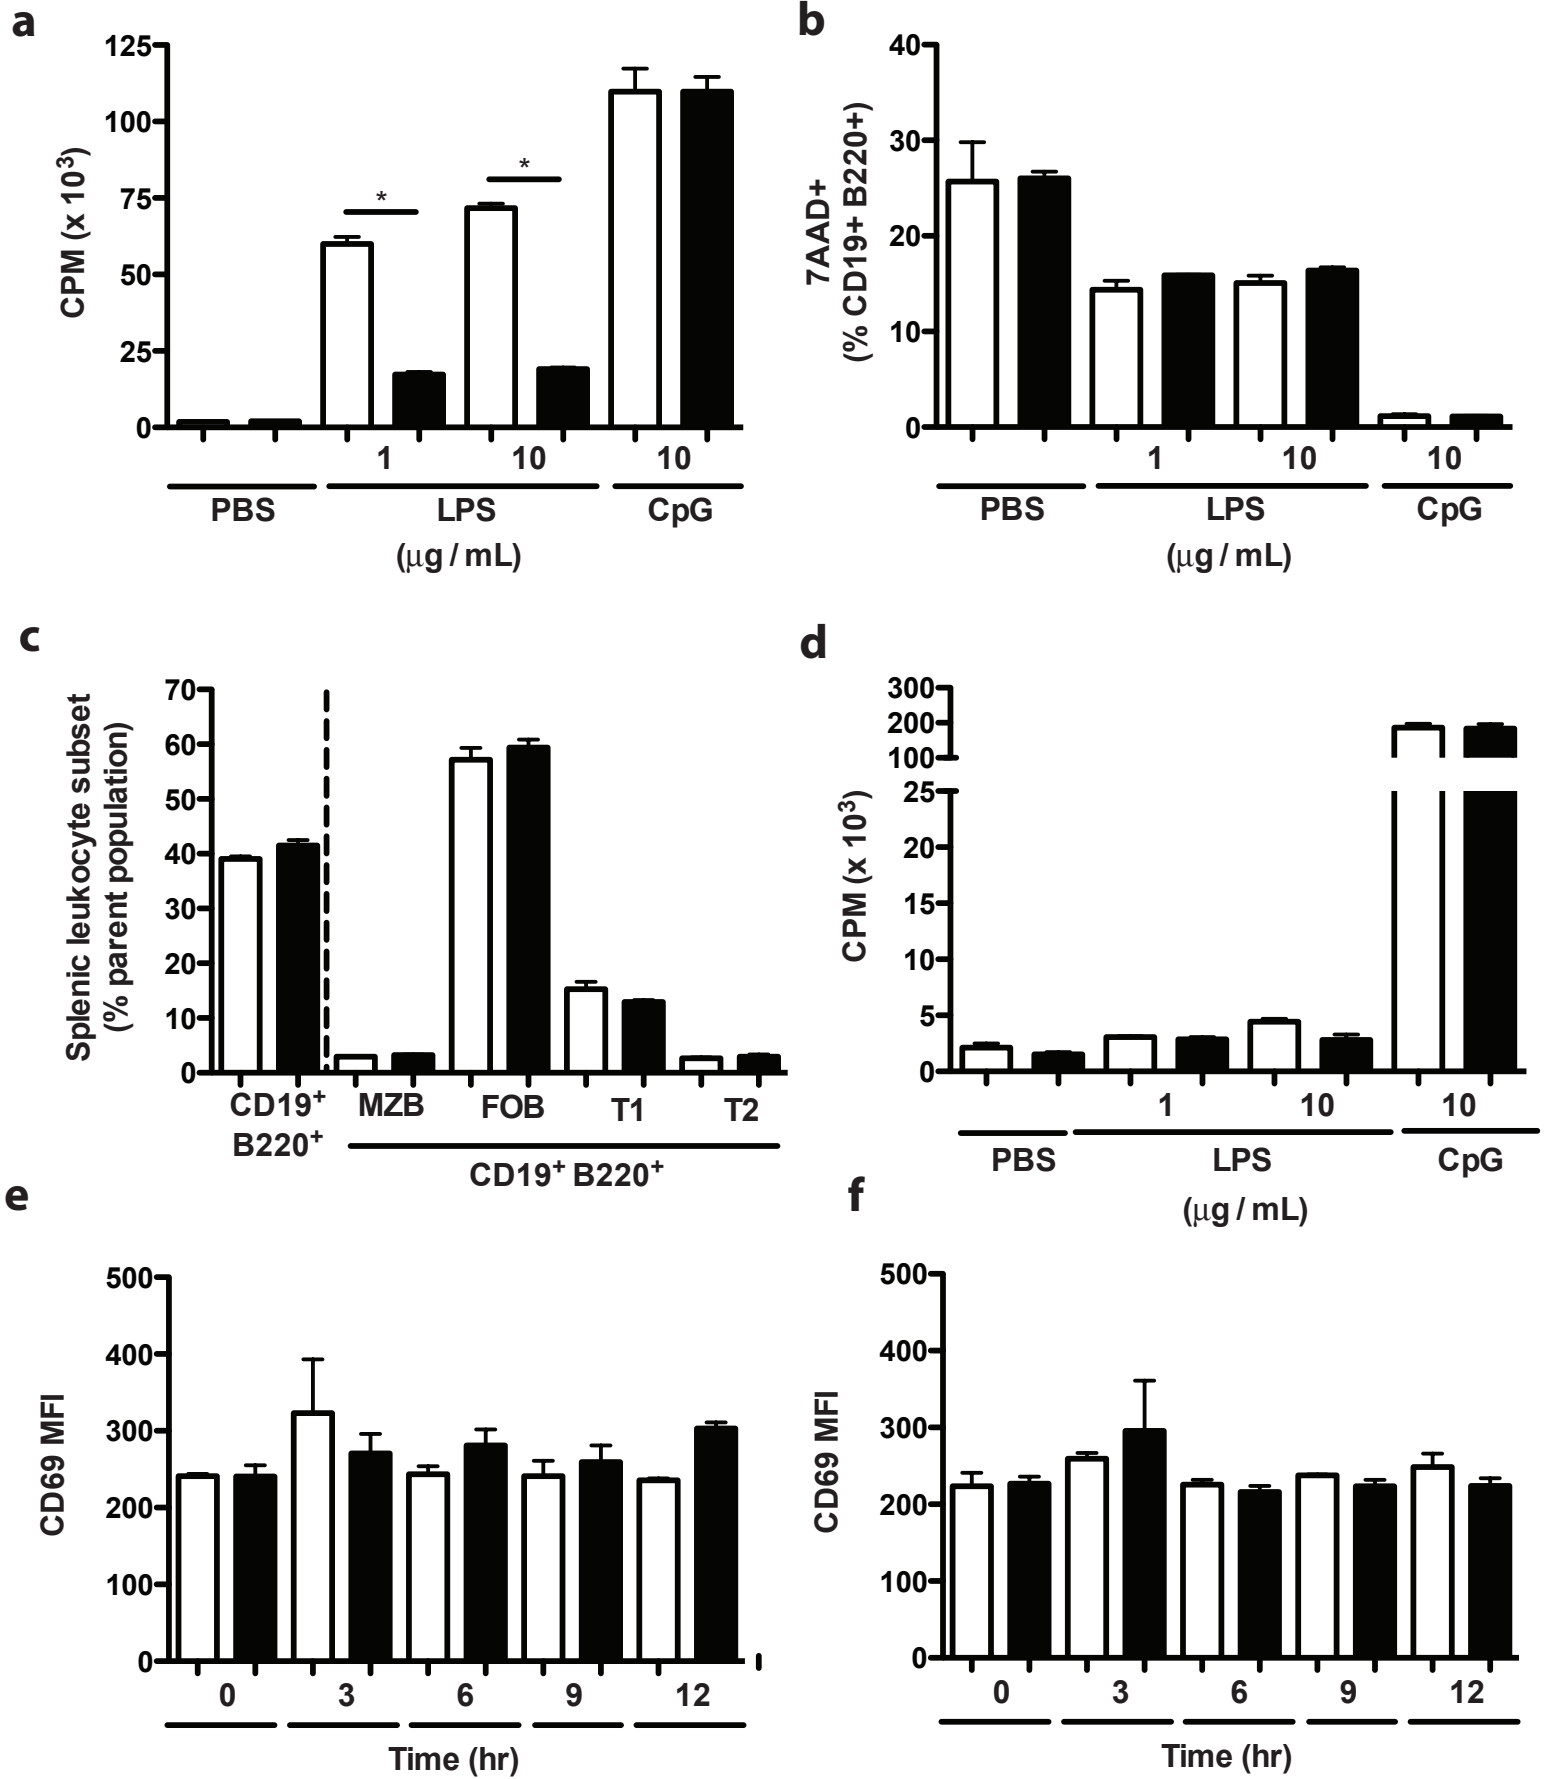

Supplementary Figure 1

**g**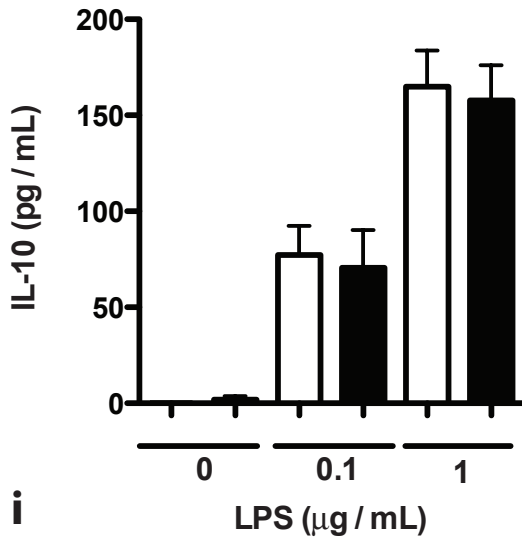**h**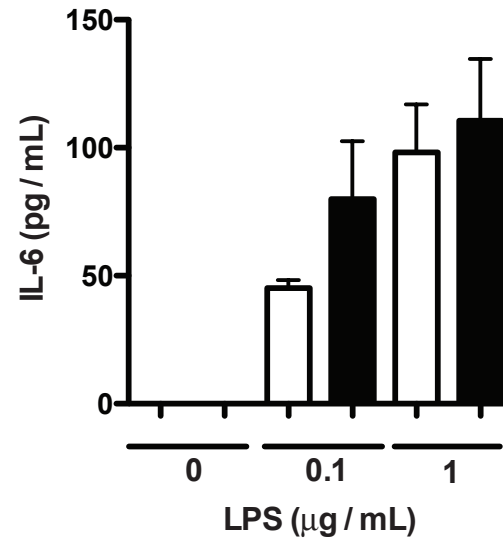**i**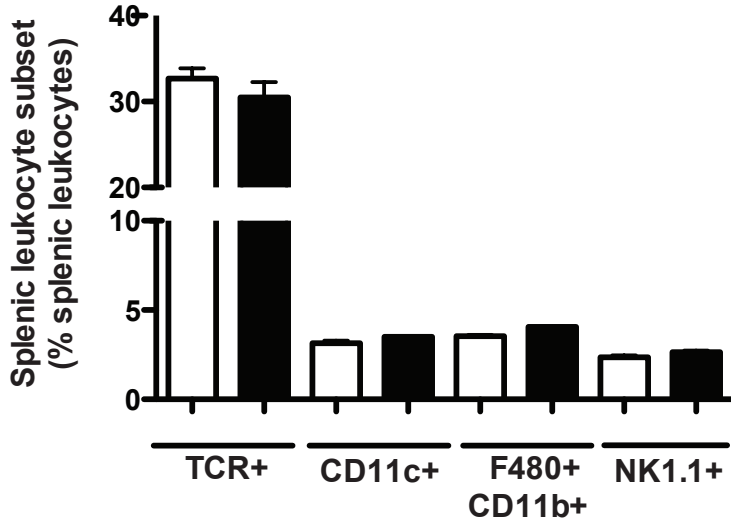

Supplement: NIHMS347165-supplement-2.pdf [file NIHMS347165-supplement-2.pdf]

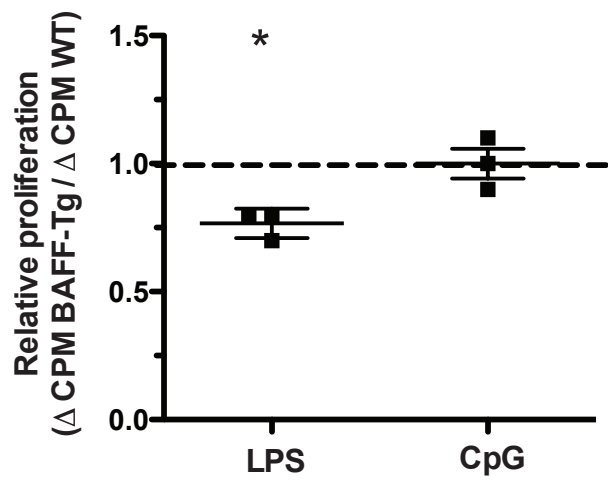

Supplement: NIHMS347165-supplement-3.pdf [file NIHMS347165-supplement-3.pdf]
